# Supplementary material for: Long-Term Immunogenicity upon Pertussis Booster Vaccination in Young Adults and Children in Relation to Priming Vaccinations in Infancy
Source: MDPI journal article supplement (doi:10.3390/vaccines10050693), 2022-04-28
Supplement: s1 [file s1]

## Supplementary Materials

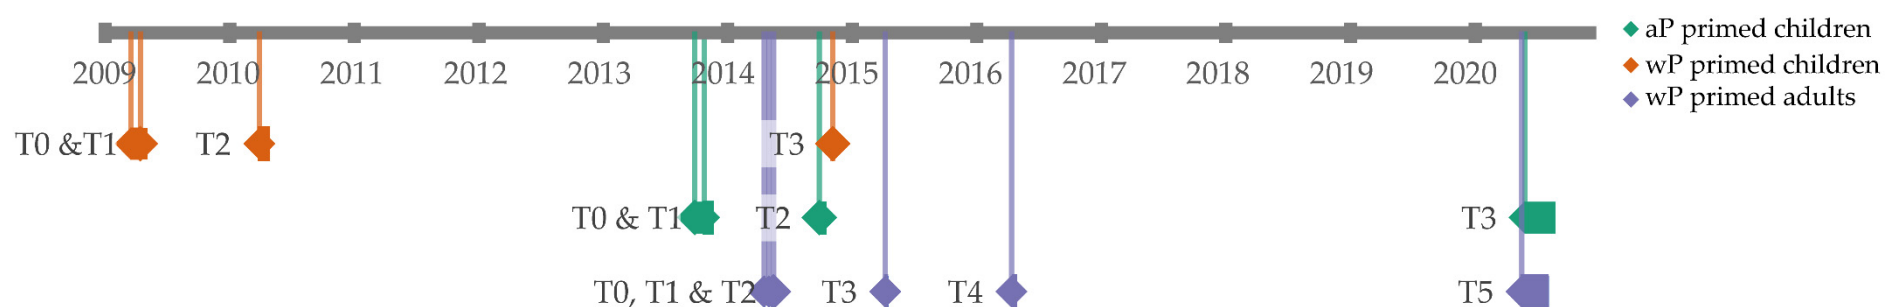

**Figure S1.** Timelines for the different study cohorts. T0-T5 represent the study visits; aP primed children were recruited in the municipalities of Almere, Breda, Eindhoven, Ede, and Utrecht; wP primed children were recruited in the city of Hoofddorp; wP primed adults were recruited in the municipality of Amersfoort. aP: acellular pertussis; wP: whole cell pertussis ; T: time point.

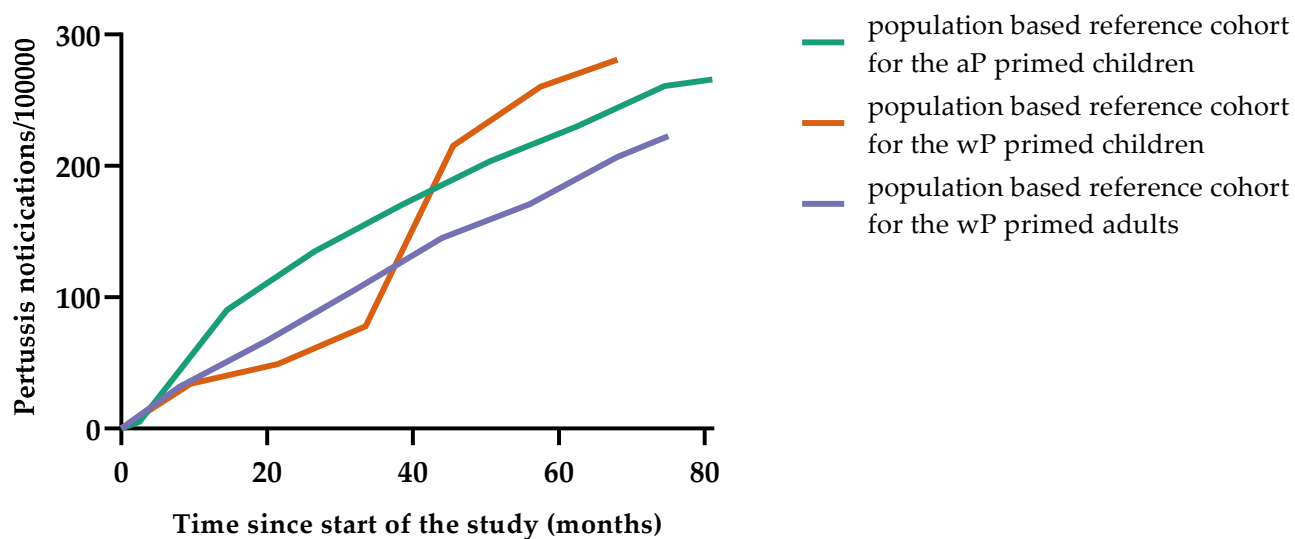

**Figure S2.** Cumulative local pertussis disease notifications per 100,000 inhabitants. Pertussis disease notification data were obtained from the Dutch National Institute for Public Health and the Environment (RIVM) based on the postal code matched regions at times of inclusion for the three study cohorts, covering the period from inclusion to final blood draw per cohort. Incidence is plotted against the amount of inhabitants in the concerning region. aP: acellular pertussis; wP: whole cell pertussis

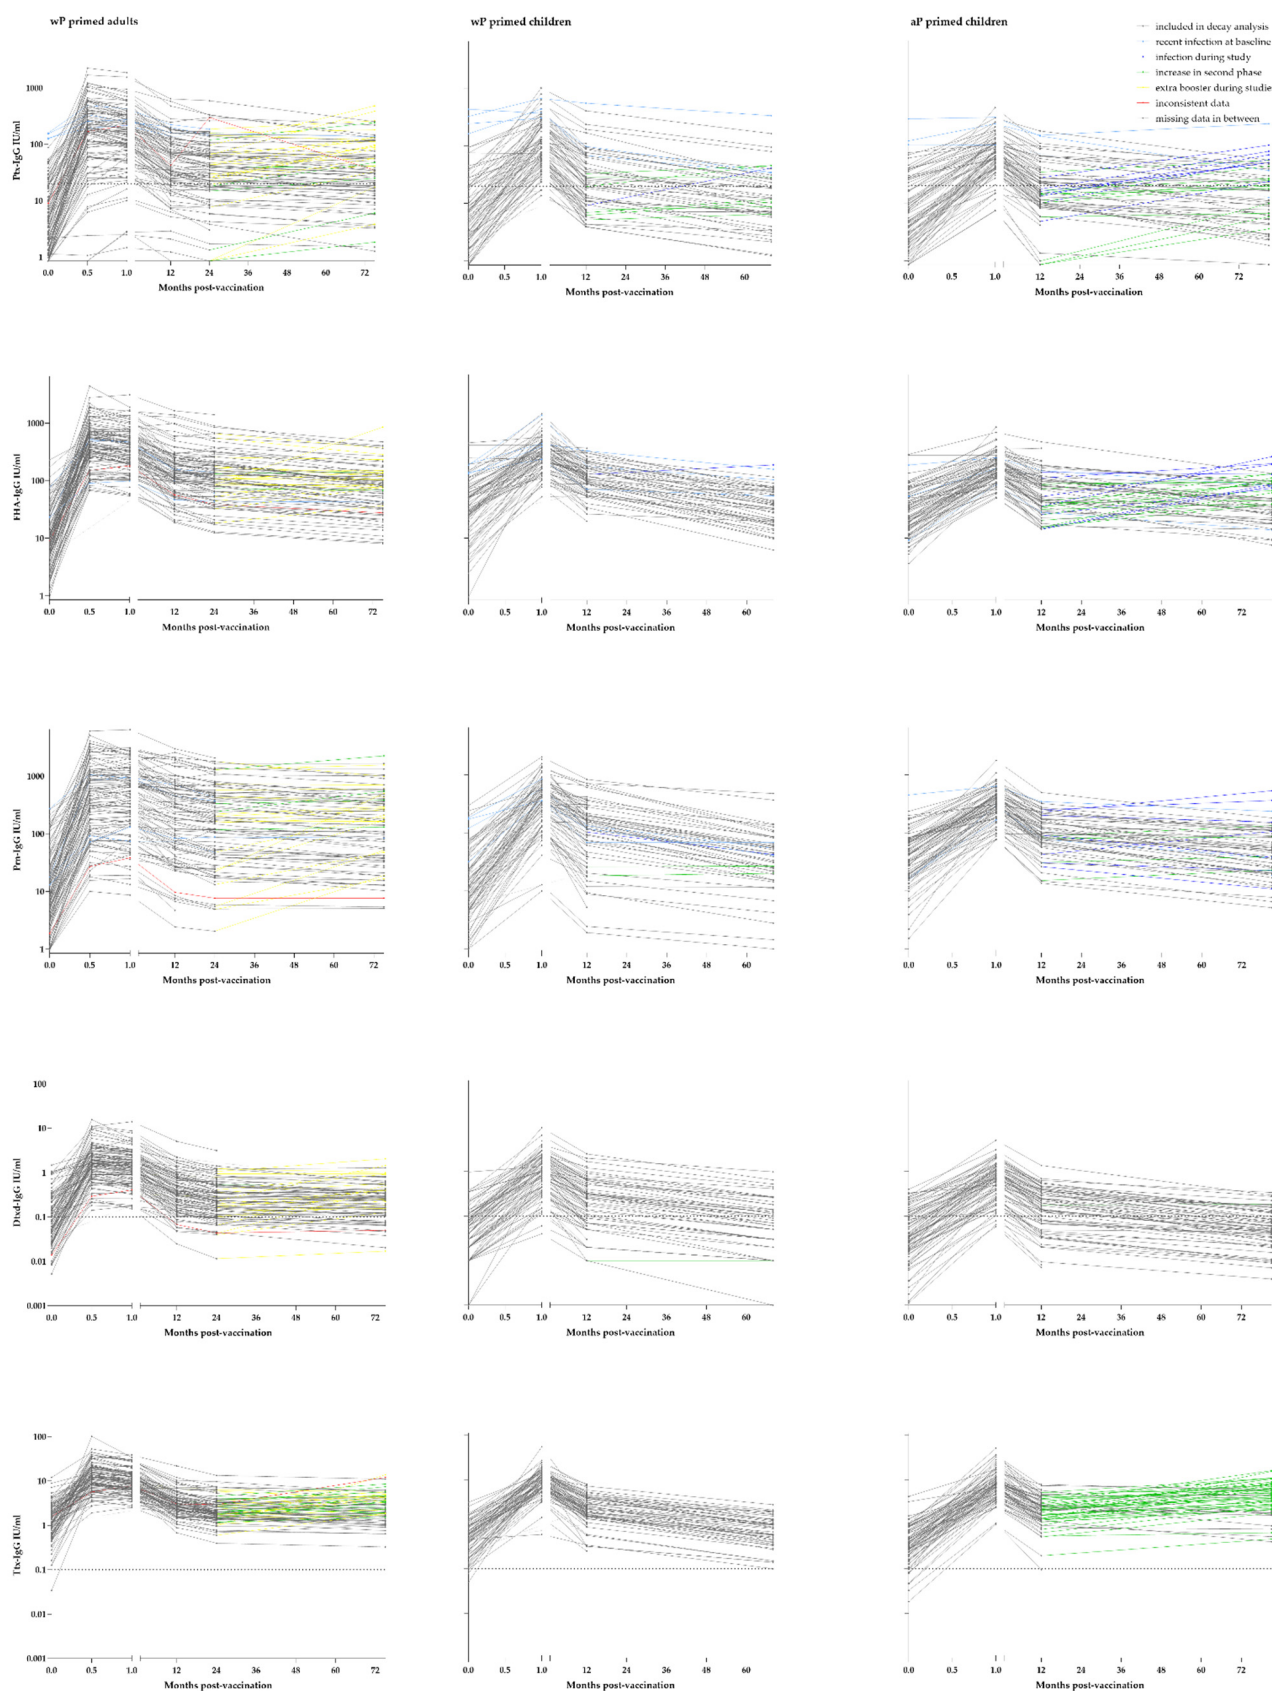

**Figure S3.** Individual responses. aP: acellular pertussis; wP: whole cell pertussis IU: international units; Ptx: pertussis toxin; FHA: filamentous haemagglutinin; Prn: pertactin; Dxt: diphtheria toxoid; Txt: tetanus toxin.

**Table S1.** *B. Pertussis* vaccine schedules and vaccines in the Netherlands.

| Year       | Scheme                              | Vaccine composition       | Change                                                   | pertussis Vaccine name (Company)           |
|------------|-------------------------------------|---------------------------|----------------------------------------------------------|--------------------------------------------|
| before     |                                     |                           |                                                          | No vaccine available                       |
| 1954       |                                     | DTwP                      | Combination vaccine became available                     | DTwP (RIVM)                                |
| 1957       | 3,4,5,11 m                          | DTwP                      | Start of NIP                                             | DTwP (RIVM)                                |
| 1962       | 3,4,5,11 m                          | DTwP-IPV                  | Addition of IPV                                          | DTwP-IPV (RIVM)                            |
| 1997       | 3,4,5,11 m                          | DTwP-IPV + Hib            | Addition of Hib tot schedule                             | DTwP-IPV (RIVM)                            |
| 1999       | 2,3,4,11 m                          | DTwP-IPV + Hib            | Accelerated vaccination                                  | DTwP-IPV (RIVM)                            |
| 2001       | 2,3,4,11 m                          | DTwP-IPV + Hib            |                                                          | DTwP-IPV (RIVM)                            |
|            | 4y                                  | DT-IPV + aP3              | Introduction aP booster, 3 Bp components                 | monovalent aP (GSK)                        |
| 2003       | 2,3,4,11 m                          | DTwP-IPV-Hib              | Combination vaccine                                      | DTwP-IPV/Hib (NVI)                         |
|            | 4y                                  | DT-IPV + aP3              |                                                          | monovalent aP (GSK)                        |
| 2005       | 2,3,4,11 m                          | DTaP3-IPV-Hib             | Introduction aP priming, 3 Bp components                 | Infanrix IPV + Hib (GSK)                   |
|            | 4y                                  | DT-IPV + aP3              |                                                          | monovalent aP (GSK)                        |
| 2006 (Jan) | 2,3,4,11 m                          | DTaP5-IPV-Hib             | 5 Bp components                                          | Pediacel (SP MSD)                          |
|            | 4y                                  | DT-IPV + aP3              |                                                          | monovalent aP (GSK)                        |
| 2006 (Jun) | 2,3,4,11 m                          | DTaP5-IPV-Hib + Pneu      | Addition of Pneu to schedule;                            | Pediacel (SP MSD)                          |
|            | 4y                                  | DT-IPV + aP3              |                                                          | monovalent aP (GSK)                        |
| 2006 (Jul) | 2,3,4,11 m                          | DTaP5-IPV-Hib + Pneu      |                                                          | Pediacel (SP MSD)                          |
|            | 4y                                  | DTaP5-IPV                 | Combination vaccine, 5 Bp components                     | Triaxis Polio (SP MSD)                     |
| 2008 (Feb) | 2,3,4,11 m                          | DTaP5P-IPV-Hib + Pneu     |                                                          | Pediacel (SP MSD)                          |
|            | 4y                                  | DTaP3-IPV                 | 3 Bp components                                          | Infanrix-IPV (GSK)                         |
| 2008 (Jul) | 2,3,4,11 m                          | DTaP3-IPV-Hib + Pneu      | 3 Bp components                                          | Infanrix-IPV + Hib (GSK)                   |
|            | 4y                                  | DTaP3-IPV                 |                                                          | Infanrix-IPV (GSK)                         |
| 2009       | 2,3,4,11 m                          | DTaP3/5-IPV-Hib + Pneu    | 3 or 5 Bp components                                     | Pediacel (SP MSD)/Infanrix-IPV + Hib (GSK) |
|            | 4y                                  | DTaP3-IPV                 |                                                          | Infanrix-IPV (GSK)                         |
| 2010       | 2,3,4,11 m                          | DTaP5-IPV-Hib + Pneu      | 5 Bp components                                          | Pediacel (SP MSD)                          |
|            | 4y                                  | DTaP3-IPV                 |                                                          | Infanrix-IPV (GSK)                         |
| 2011 (Oct) | 2,3,4,11 m                          | DTaP3-IPV-Hib-HepB + Pneu | Addition of HepB to schedule, 3 Bp components            | Infanrix hexa (GSK)                        |
|            | 4y                                  | DTaP3-IPV                 |                                                          | Infanrix-IPV (GSK)                         |
| 2017 (Jan) | 2,3,4,11 m                          | DTaP3-IPV-Hib-HepB + Pneu |                                                          | Infanrix hexa (GSK)                        |
|            | 4y                                  | Tdap3-IPV                 | Reduced dose Bp components                               | Boostrix-IPV (GSK)                         |
| 2018 (Dec) | 2,3,4,11 m                          | DTaP5-IPV-Hib-HepB + Pneu | 5 Bp components                                          | Vaxelis (SP MSD)                           |
|            | 4y                                  | Tdap3-IPV                 |                                                          | Boostrix-IPV (GSK)                         |
| 2019 (Dec) | Maternal (22 weeks gestational age) | Tdap3                     | Booster for pregnant women, 3 reduced dose Bp components | Boostrix (GSK)                             |
|            | 3, 5, 11m                           | DTaP3-IPV-Hib-HepB + Pneu | Revised priming schedule                                 | Vaxelis (SP MSD)                           |
| 2020       | 4y                                  | Tdap3-IPV                 |                                                          | Boostrix-IPV (GSK)                         |

Supplementary Table 1. m=months; y= years; D=diphtheria; T=tetanus; wP: whole cell pertussis; aP: acellular pertussis; IPV: inactivated poliovirus; Pneu: pneumococcal; Hib: Haemophilus influenzae type B; HepB: Hepatitis B; Bp: *Bordetella pertussis*; NVI: Netherlands Vaccine Institute; GSK: GlaxoSmithKline; SP: Sanofi Pasteur; MSD: Merck Sharp & Dohme. This table is a modified from Versteegen P, Berbers GAM, Smits G, et al. More than 10 years after introduction of an acellular pertussis vaccine in infancy: a cross-sectional serosurvey of pertussis in the Netherlands. *The Lancet Regional Health – Europe* 2021; 6(10): 1016. doi: 10.1016/j.lanepe.2021.100196.
